# Supplementary material for: Structural Determinants of Integrin Binding to the Talin Rod
Source: PubMed Central journal article supplement — J Biol Chem. 2009 Mar 27;284(13):8866–76. doi: 10.1074/jbc.M805937200 (PMC2659244; doi:10.1074/jbc.m805937200), 2009-03-27

## STRUCTURAL DETERMINANTS OF THE INTEGRIN-BINDING SITE (IBS2) IN THE TALIN ROD

Alexandre R. Gingras, Wolfgang H. Ziegler, Andrey A. Bobkov, M. Gordon Joyce, Domenico Fasci, Mirko Himmel, Sven Rothmund, Anett Ritter, J. Günter Grossmann, Bipin Patel, Neil Bate, Benjamin T. Goult, Jonas Emsley, Igor L. Barsukov, Gordon C. K. Roberts, Robert C. Liddington, Mark H. Ginsberg, and David R. Critchley

### SUPPLEMENTARY METHODS

*Sequence conservation of talin 1974-2293.* The sequence of talin residues 1974-2293 has been aligned across species. The alignment was performed using MultAlin (1) using the following sequences: *Mus musculus* talin-1; *Mus musculus* talin-2; *Homo sapiens*; *Gallus gallus*; *Danio rerio*; *Drosophila melanogaster*; and *Caneorhabditis elegans*. The map of surface exposed conserved residues is shown in Figure S2C - >90% conservation is indicated in magenta.

### SUPPLEMENTARY FIGURE LEGENDS

**FIGURE S1. Small angle X-ray scattering on talin 1974-2293 - Guinier plot.** The linearity of the Guinier plot indicates that the protein solutions were homogeneous and no protein aggregation was detected.

**FIGURE S2. Crystal structure of talin residues 1974-2293.** (A) Cartoon representation of the talin 1974-2293 crystal structure. The lower panel is rotated by 180 degrees. The upper 5-helix bundle is called IBS2-A and the lower one IBS2-B. The helix numbers shown in brackets are for full-length talin. (B) Electrostatic potential surface representation in the same orientation as shown in A. The areas of contact between the different molecules in the crystal are indicated by a dashed line in the lower panel. (C) Map of surface exposed conserved residues - invariant residues are shown in magenta.

**FIGURE S3. Comparison of the two talin IBS2 5-helix bundles structures.** Optimal overlays of the talin IBS2-A 5-helix bundle (green) with (A) the IBS2-B 5-helix bundle (blue) - 140 residues aligned with an rmsd of 2.4Å, and (B) the talin 482-655 5-helix bundle (blue) (PDB entry 1SJ7) - 114 residues aligned with an rmsd of 2.5Å as determined with Coot (2). The topology of the 5-helix bundles is shown below. Solid and dashed lines represent connecting loops on opposite ends of the helices.

**FIGURE S4. NMR characterisation of the individual IBS2-A and IBS2-B domains and the IBS2 double-domain.** <sup>15</sup>N-HSQC spectra of talin polypeptides spanning residues (A) 1974-2293, (B) 1974-2140, and (C) 2137-2293.

### SUPPLEMENTARY REFERENCES

1. Corpet, F. (1988) *Nucleic Acids Res* 16(22), 10881-10890
2. Emsley, P., and Cowtan, K. (2004) *Acta Crystallogr D Biol Crystallogr* 60(Pt 12 Pt 1), 2126-2132

Figure S1

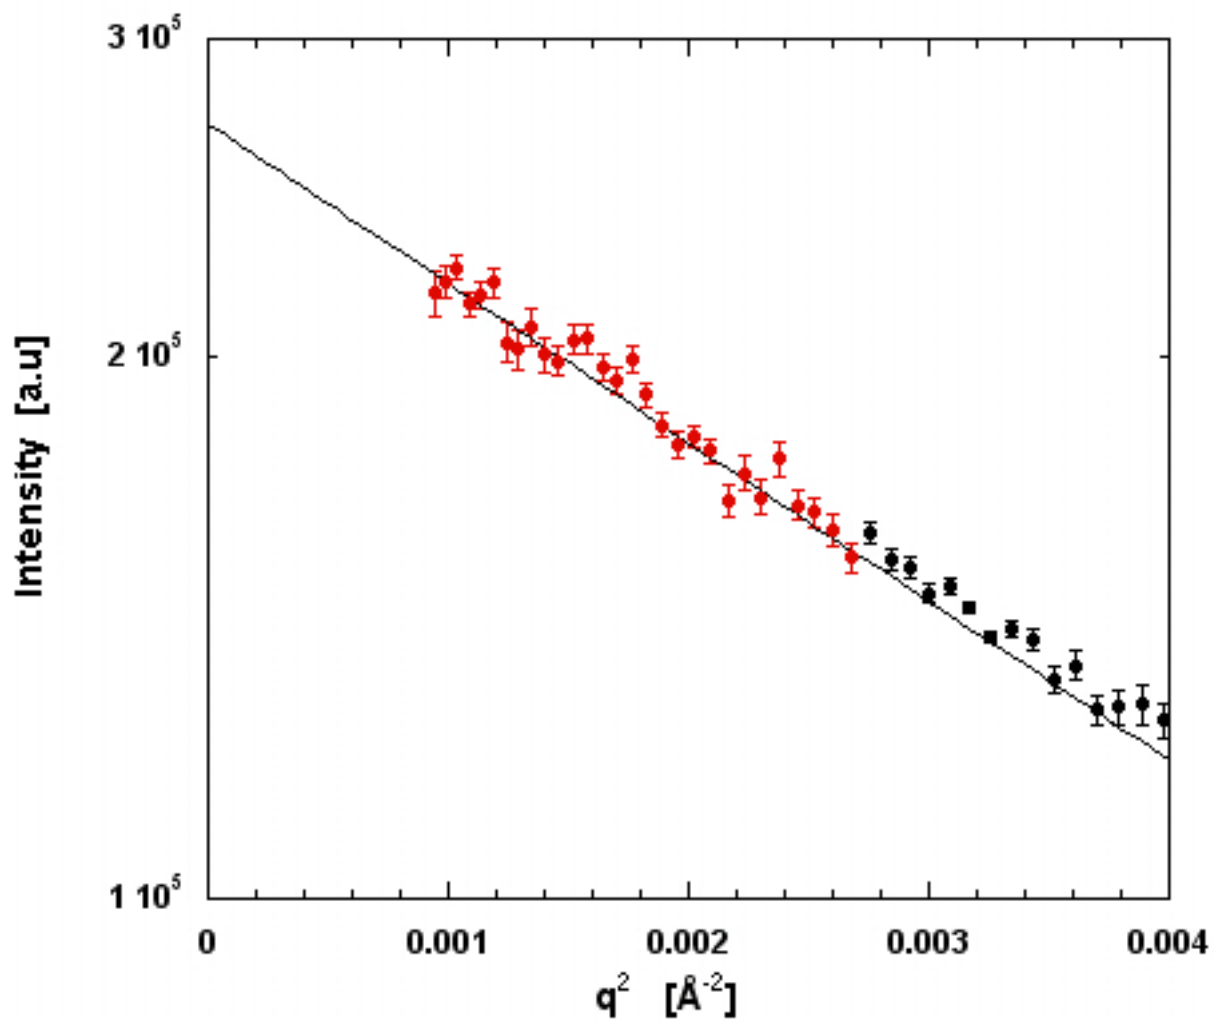

Figure S2

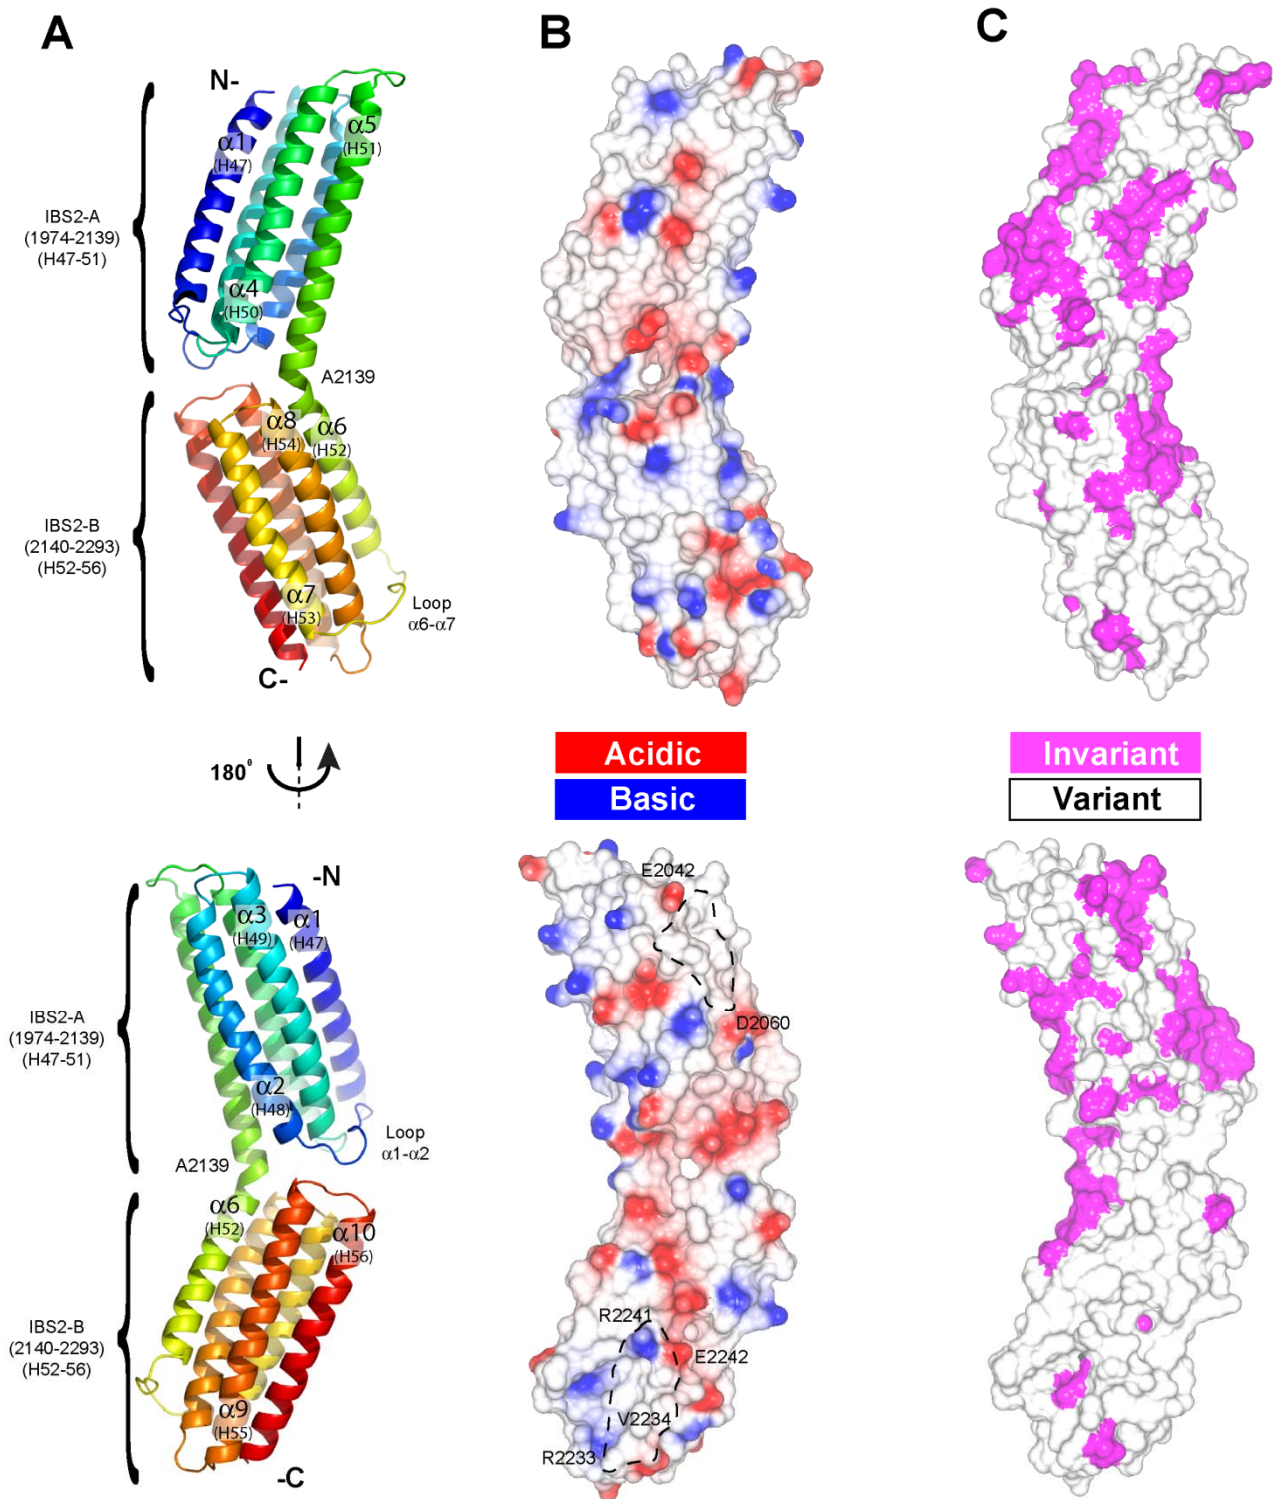

Figure S3

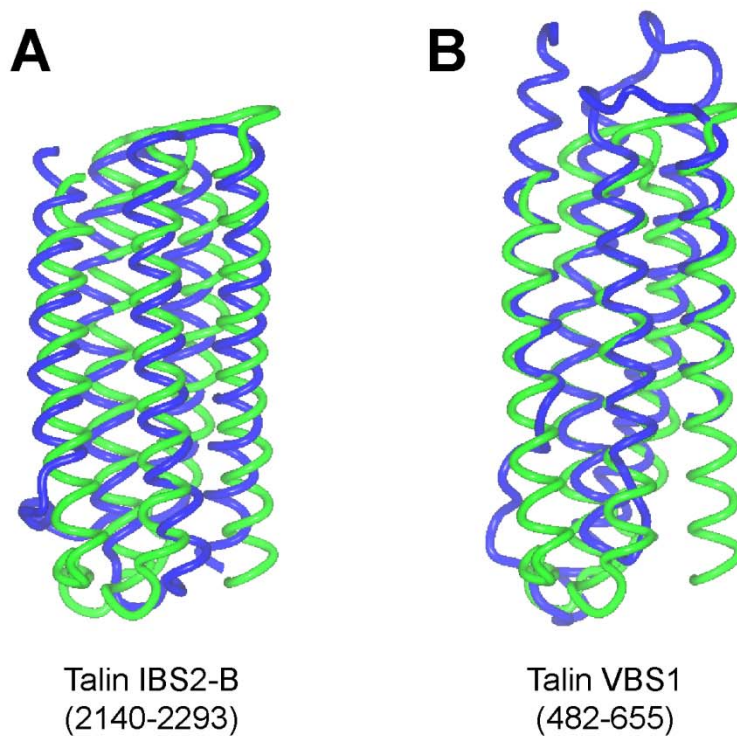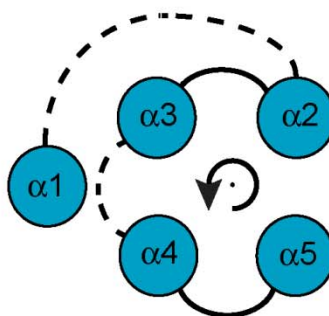

Talin VBS1  
Talin IBS2-A  
Talin IBS2-B

Figure S4

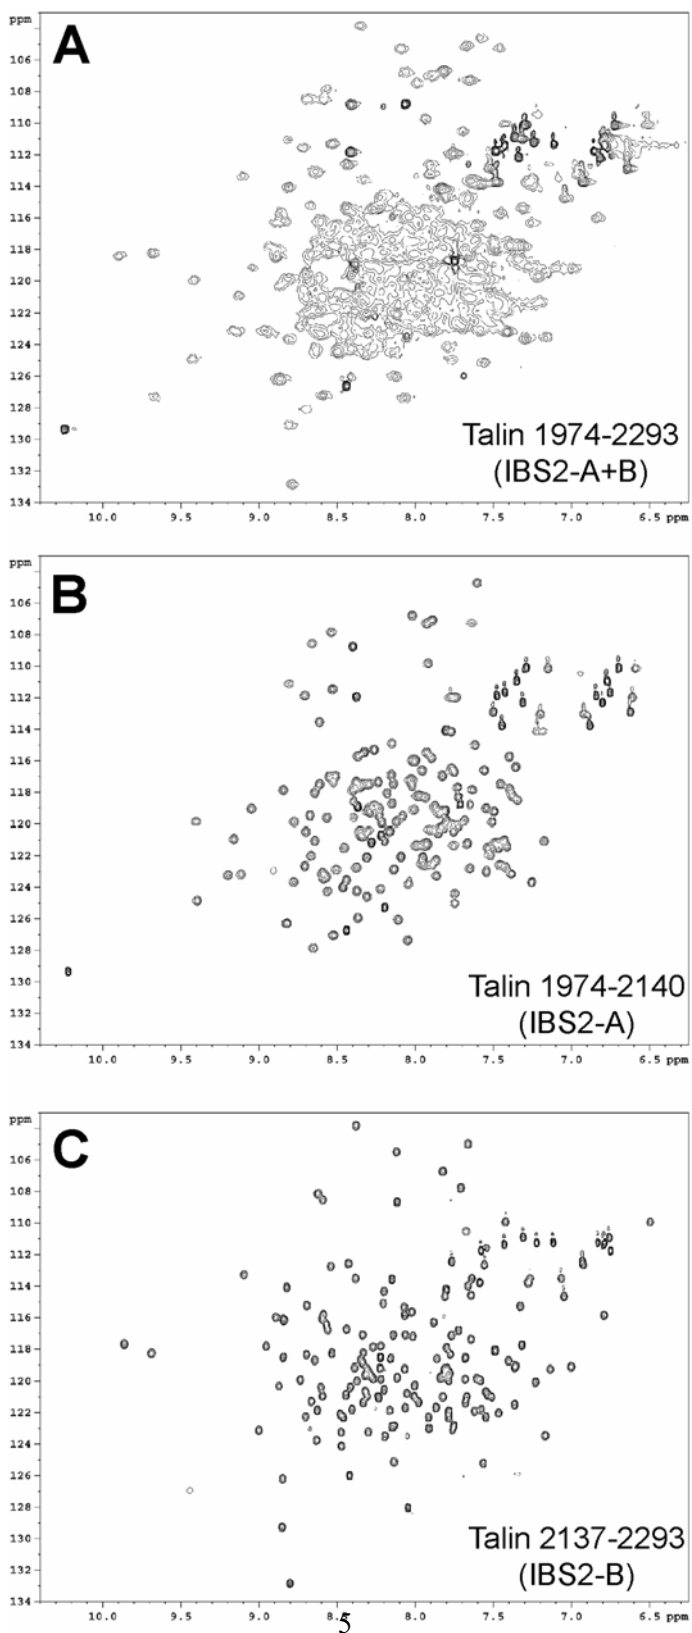

Supplement: M805937200_1.pdf [file M805937200_1.pdf]
